# Supplementary material for: Scrutiny of Mycobacterium tuberculosis 19 kDa antigen proteoforms provides new insights in the lipoglycoprotein biogenesis paradigm
Source: PubMed Central journal article supplement (PMC5341126; doi:10.1038/srep43682), 2017-03-08
Supplement: srep43682-s1.pdf [file srep43682-s1.pdf]

# Supplementary information

## **Scrutiny of *Mycobacterium tuberculosis* 19 kDa antigen proteoforms provides new insights in the lipoglycoprotein biogenesis paradigm**

Julien Parra<sup>1,+</sup>, Julien Marcoux<sup>1,+</sup>, Isabelle Poncin<sup>2</sup>, Stéphane Canaan<sup>2</sup>, Jean Louis Herrmann<sup>3</sup>, Jérôme Nigou<sup>1</sup>, Odile Burlet-Schiltz<sup>1,\*</sup>, Michel Rivière<sup>1,\*</sup>

<sup>1</sup>Institut de Pharmacologie et de Biologie Structurale, Université de Toulouse, CNRS, UPS, France

<sup>2</sup>CNRS – Aix-Marseille Université, Enzymologie Interfaciale et Physiologie de la Lipolyse UMR7282, Marseille, France

<sup>3</sup>UMR1173, INSERM, Université de Versailles St Quentin, 78180, Montigny le Bretonneux, France

\*Correspondence should be addressed to M.R. ([Michel.riviere@ipbs.fr](mailto:Michel.riviere@ipbs.fr)) or O.B-S. (email: [Odile.schiltz@ipbs.fr](mailto:Odile.schiltz@ipbs.fr))

+these authors contributed equally to this work

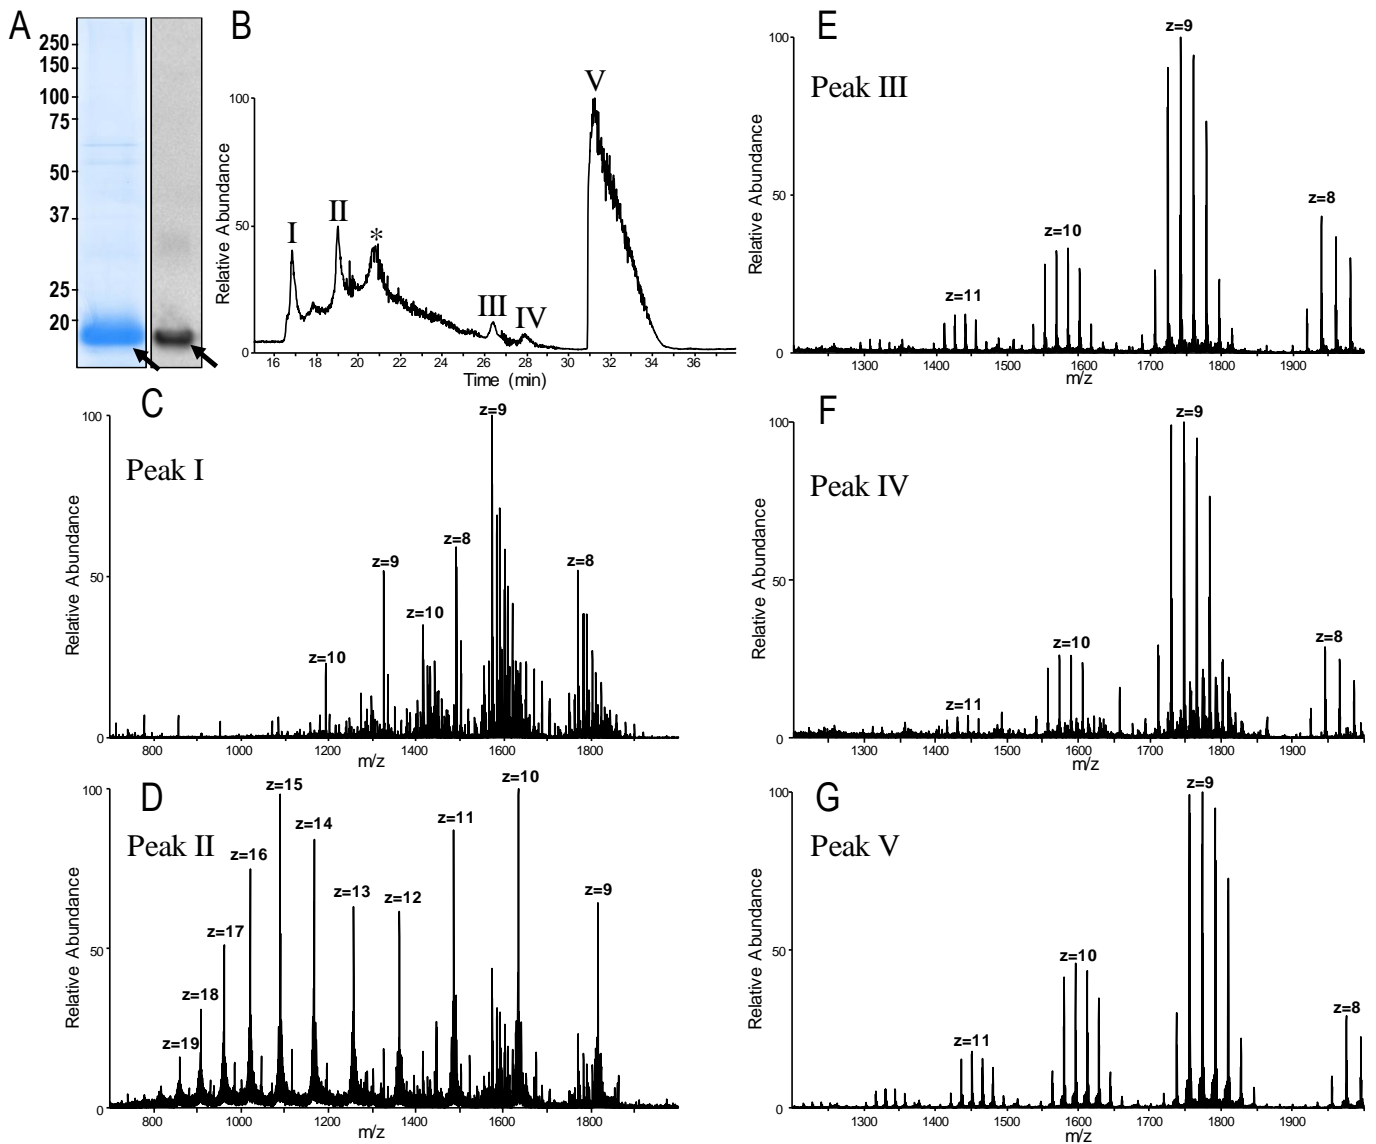

**Figure S1. A single band showing different chromatographic peaks upon LC-MS analysis. (A)** SDS-PAGE and anti His-tag Western Blotting of the recombinant LpqH<sup>His</sup> (arrows). **(B to F).** Averaged full MS scans of the chromatographic peaks I, II, III, IV and V attributed to the different classes of LpqH proteoforms observed by the LC-MS analysis. These spectra show charge state distributions ranging from 8+ to 19+.

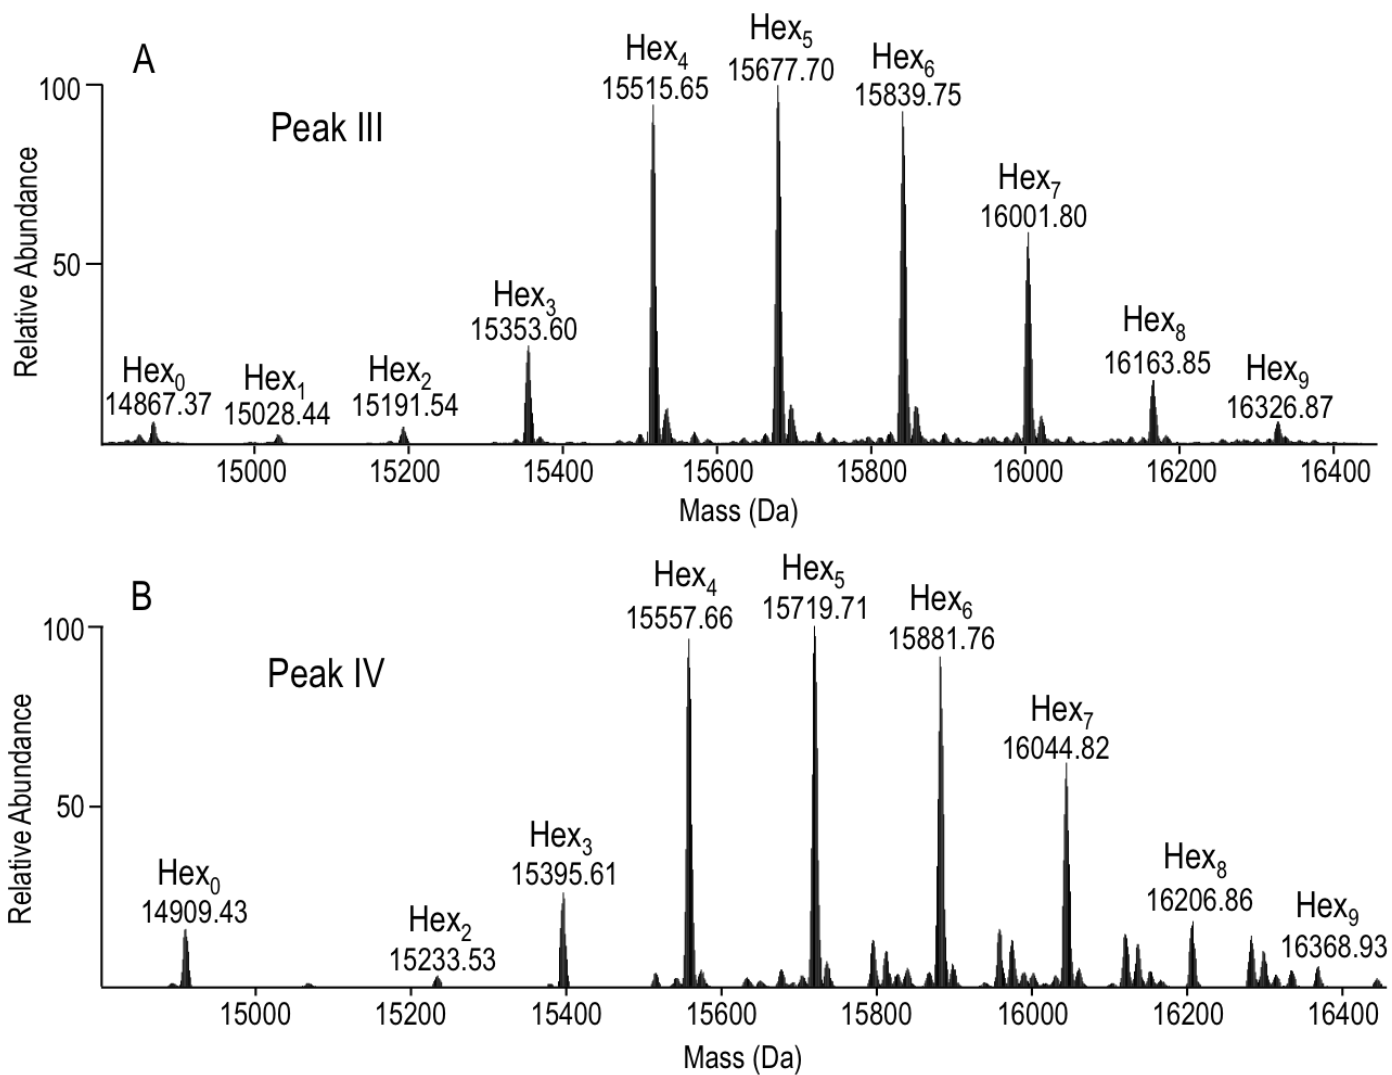

**Figure S2. Deconvoluted MS spectra of the diacylated species of rLpqH<sup>His</sup>.** Different glycoforms of rLpqH<sup>His</sup> [C<sub>22</sub>-H<sub>168</sub>] acylated with (A) a di-palmitoyl-glycerol (GroC<sub>16</sub>C<sub>16</sub>), or (B) a tuberculostearoyl-palmitoyl-glycerol (GroC<sub>16</sub>C<sub>19</sub>).

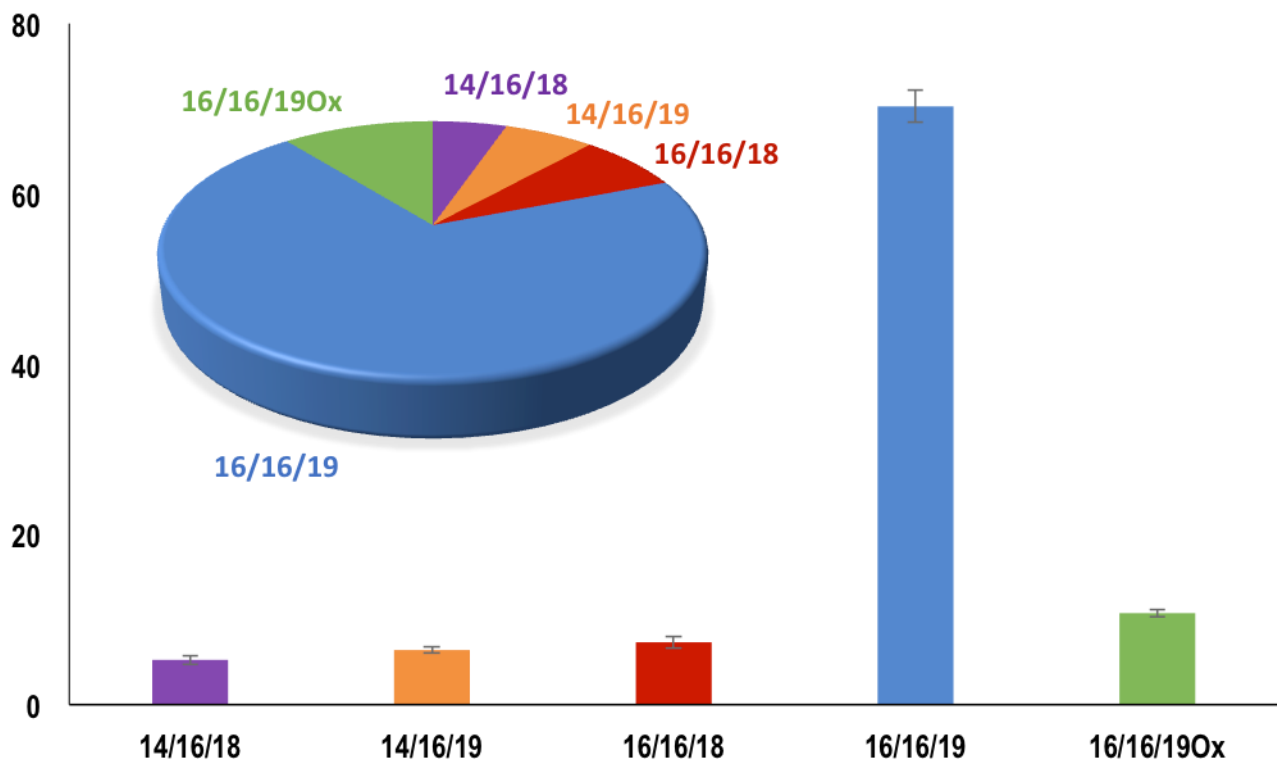

**Figure S3. Relative abundance of each lipidic composition harbored by the tri-acylated proteoforms of rLpqH<sup>His</sup>.** The error bars represent the standard deviation from the mean of 5 deconvoluted glycoforms.

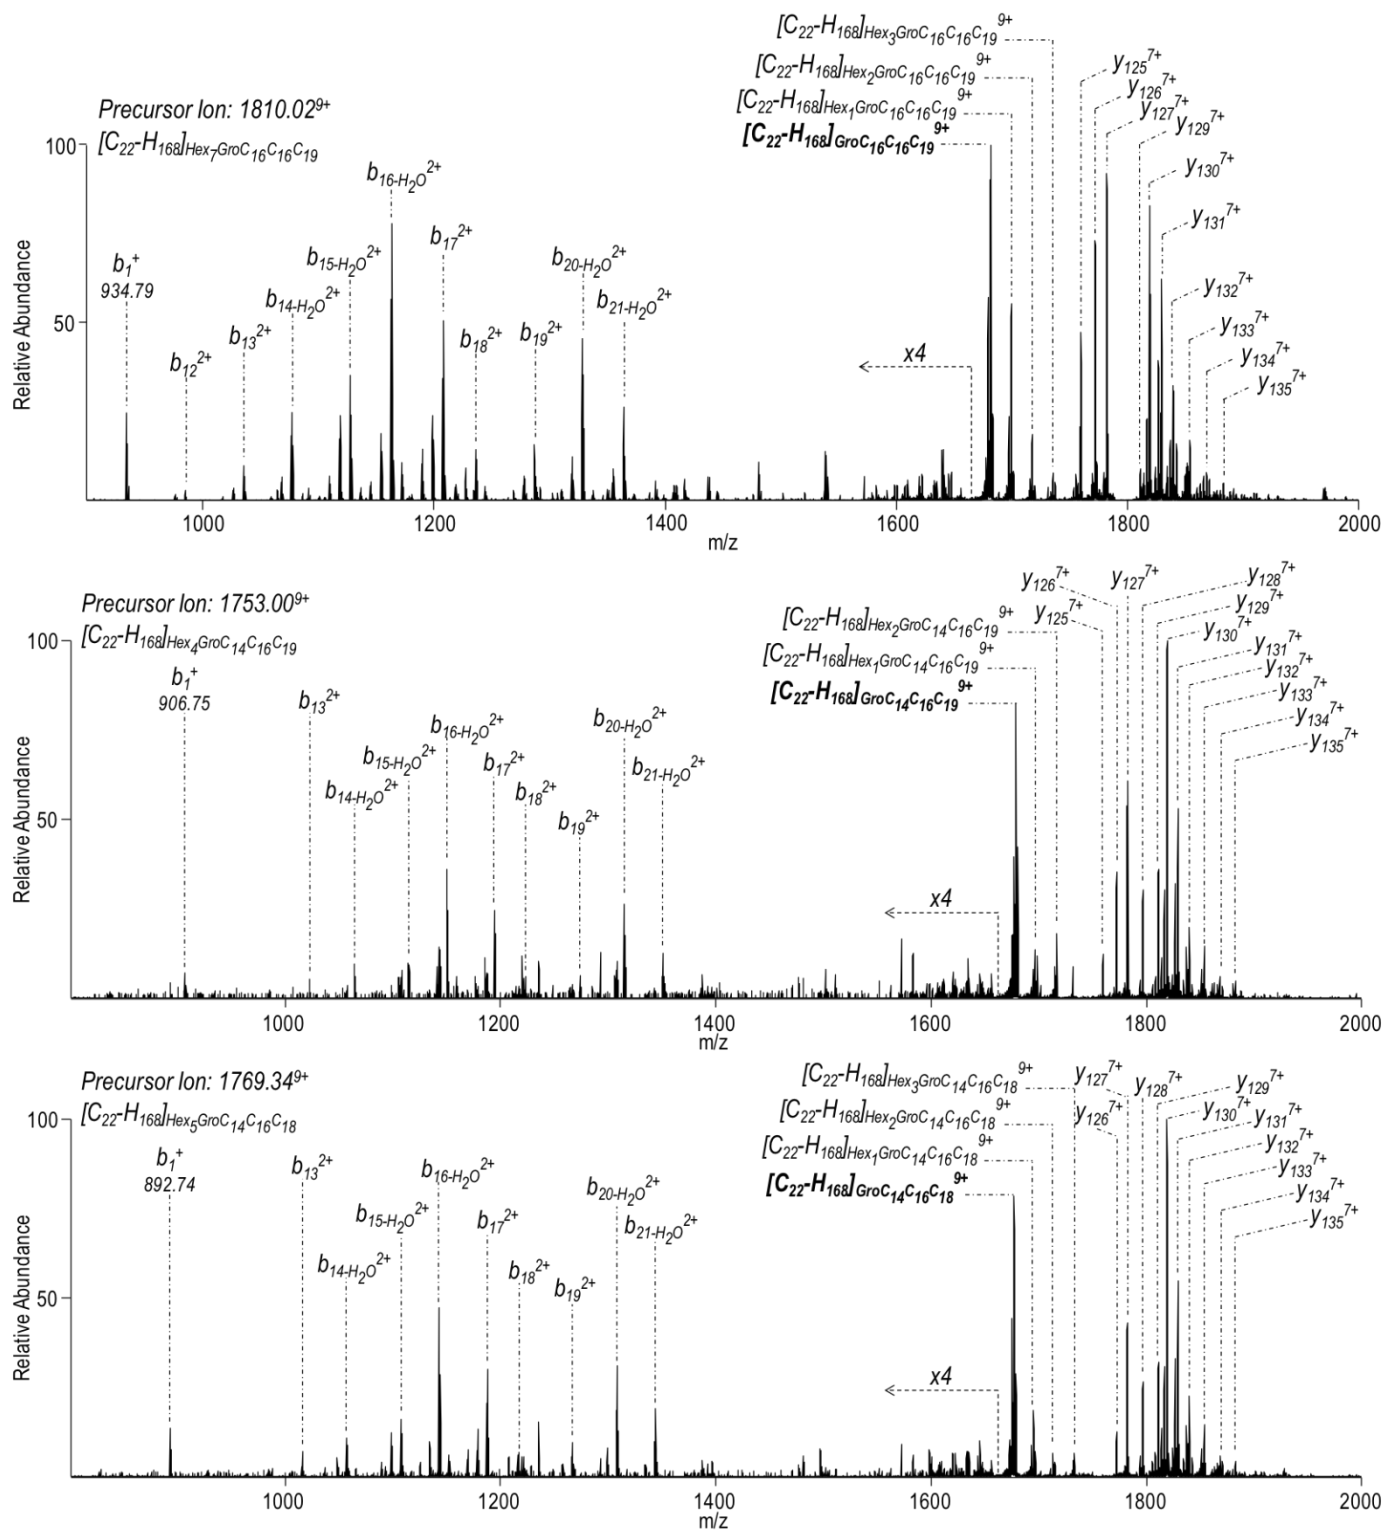

**Figure S4. Top-down CID fragmentation of triacylated rLpQH<sup>His</sup>.** (A) [C<sub>22</sub>-H<sub>168</sub>]Hex<sub>7</sub>GroC<sub>16</sub>C<sub>16</sub>C<sub>19</sub> (Precursor ion: 1810.029<sup>+</sup>), (B) [C<sub>22</sub>-H<sub>168</sub>]Hex<sub>4</sub>GroC<sub>14</sub>C<sub>16</sub>C<sub>19</sub> (Precursor ion: 1753.009<sup>+</sup>) and (C) [C<sub>22</sub>-H<sub>168</sub>]Hex<sub>5</sub>GroC<sub>14</sub>C<sub>16</sub>C<sub>18</sub> (Precursor ion: 1769.349<sup>+</sup>).

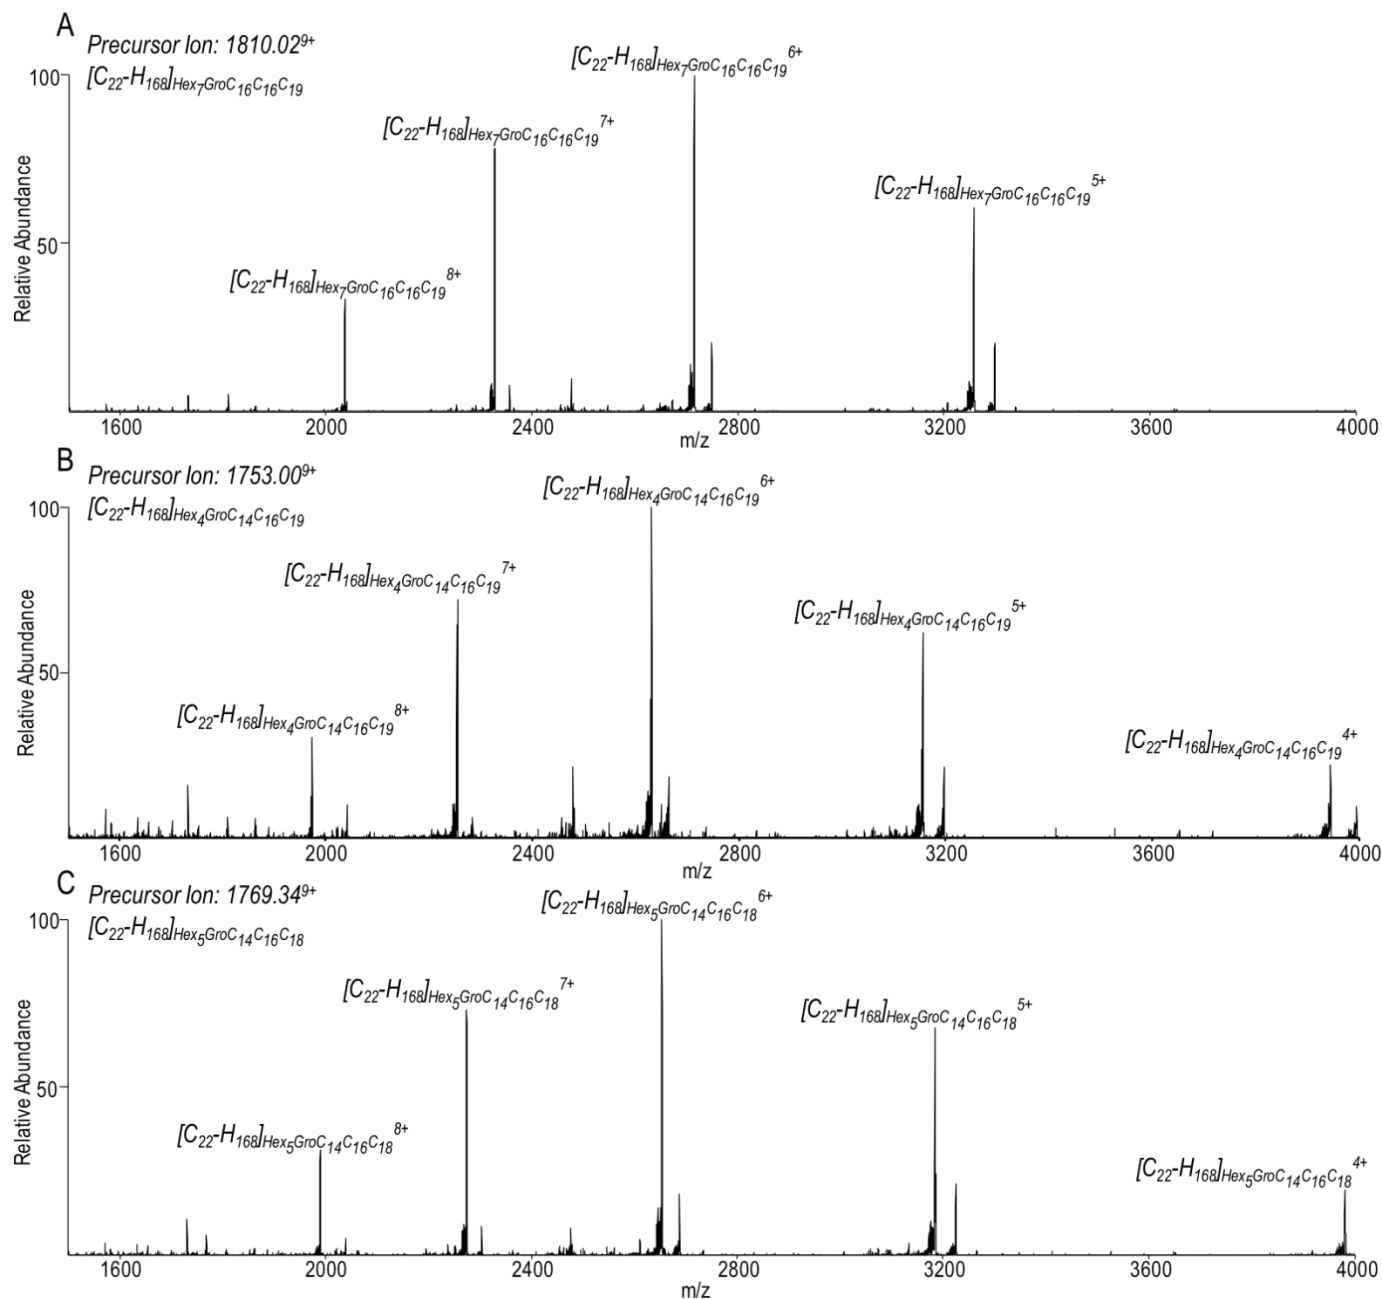

**Figure S5. Top-down ETnOD spectra of the triacylated rLpQH<sup>His</sup>.** (A)  $[C_{22}-H_{168}]Hex_7GroC_{16}C_{16}C_{19}$  (Precursor ion: 1810.02<sup>9+</sup>), (B)  $[C_{22}-H_{168}]Hex_4GroC_{14}C_{16}C_{19}$  (Precursor ion: 1753.00<sup>9+</sup>) and (C)  $[C_{22}-H_{168}]Hex_5GroC_{14}C_{16}C_{18}$  (Precursor ion: 1769.34<sup>9+</sup>).

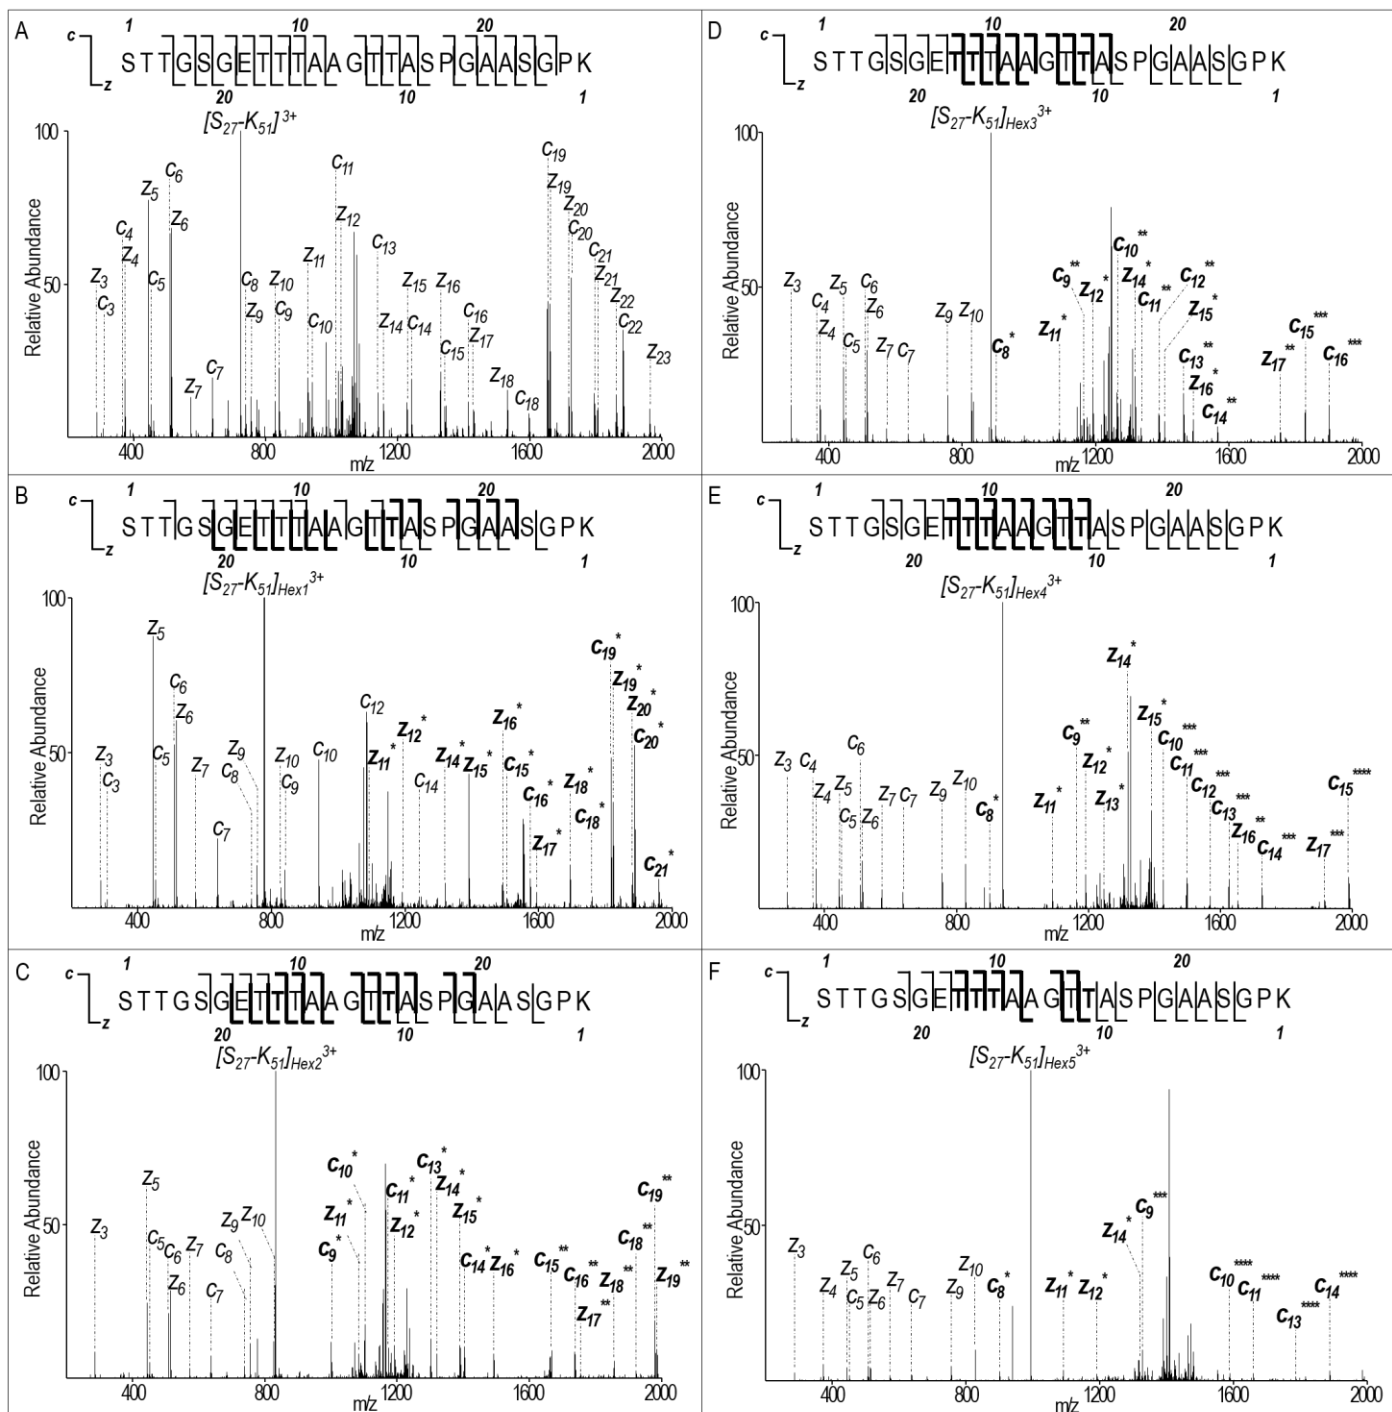

**Figure S6. Bottom-up ETD fragmentation of tryptic peptide  $S_{27}-K_{51}$ .** (A) non glycosylated (Precursor ion: 723.013+), (B) mono-glycosylated (Precursor ion: 777.033+), (C) di-glycosylated (Precursor ion: 831.043+), (D) tri-glycosylated (Precursor ion: 885.063+), (E) tetra-glycosylated (Precursor ion: 939.083+) and (F) penta-glycosylated (Precursor ion: 993.103+). Glycosylation sites and fragments are marked in bold, and number of glycosylation units are indicated by stars on spectra.

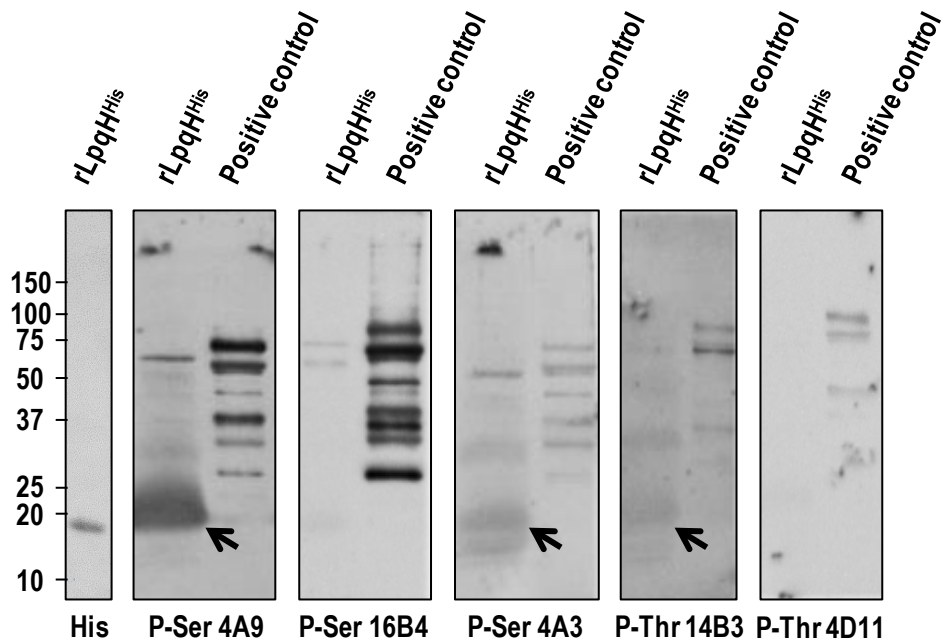

**Figure S7. Western blotting of rLpqH<sup>His</sup> with Anti-Phospho-Serine and Anti-Phospho-Threonine antibodies.** Positive controls are phosphoproteins mixture provided by antibodies manufacturers.

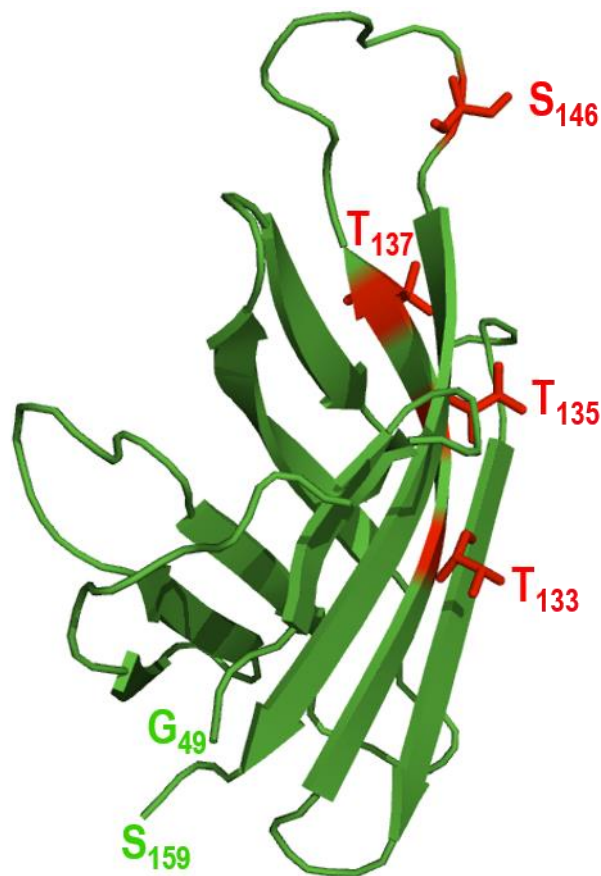

**Figure S8. Structural model of LpqH (PDB 4ZJM), and localization of the four potential phosphorylation sites (indicated in red).** Only the fragment [G<sub>49</sub>-S<sub>159</sub>] has been resolved in this model, excluding the N-terminal part of the protein encompassing all of the glycosylation and acylation sites.



**Table S1.** List of proteoforms of rLpqH<sup>His</sup> identified.  $\Delta M$  tolerance was set to 2.5 Da.

| <b>Chromatographic peak</b> | <b>Experimental Mass (Da)</b> | <b>Theoretical Mass (Da)</b> | <b><math>\Delta M</math> (Da)</b> | <b>Sequence</b>                      | <b>PTMs</b>      |
|-----------------------------|-------------------------------|------------------------------|-----------------------------------|--------------------------------------|------------------|
| I                           | 11 221.44                     | 11 222.19                    | 0.75                              | [G <sub>56</sub> -H <sub>168</sub> ] |                  |
| I                           | 11 648.69                     | 11 648.70                    | 0.01                              | [V <sub>52</sub> -H <sub>168</sub> ] |                  |
| I                           | 11 930.87                     | 11 931.03                    | 0.16                              | [G <sub>49</sub> -H <sub>168</sub> ] |                  |
| I                           | 12 017.90                     | 12 018.11                    | 0.21                              | [S <sub>48</sub> -H <sub>168</sub> ] |                  |
| I                           | 12 088.94                     | 12 089.19                    | 0.25                              | [A <sub>47</sub> -H <sub>168</sub> ] |                  |
| I                           | 12 158.97                     | 12 160.27                    | 1.30                              | [A <sub>46</sub> -H <sub>168</sub> ] |                  |
| I                           | 12 401.09                     | 12 401.51                    | 0.42                              | [S <sub>43</sub> -H <sub>168</sub> ] |                  |
| I                           | 12 472.12                     | 12 472.59                    | 0.47                              | [A <sub>42</sub> -H <sub>168</sub> ] |                  |
| I                           | 12 735.23                     | 12 735.74                    | 0.51                              | [T <sub>41</sub> -H <sub>168</sub> ] | Hex <sub>1</sub> |
| I                           | 13 933.69                     | 13 932.79                    | 0.90                              | [T <sub>29</sub> -H <sub>168</sub> ] | Hex <sub>2</sub> |
| I                           | 13 993.75                     | 13 993.74                    | 0.01                              | [G <sub>30</sub> -H <sub>168</sub> ] | Hex <sub>3</sub> |
| I                           | 14 095.78                     | 14 094.84                    | 0.94                              | [T <sub>29</sub> -H <sub>168</sub> ] | Hex <sub>3</sub> |
| I                           | 14 155.79                     | 14 155.79                    | 0.00                              | [G <sub>30</sub> -H <sub>168</sub> ] | Hex <sub>4</sub> |
| I                           | 14 195.82                     | 14 195.94                    | 0.12                              | [T <sub>28</sub> -H <sub>168</sub> ] | Hex <sub>3</sub> |
| I                           | 14 256.84                     | 14 256.89                    | 0.05                              | [T <sub>29</sub> -H <sub>168</sub> ] | Hex <sub>4</sub> |
| I                           | 14 283.81                     | 14 283.04                    | 0.77                              | [S <sub>27</sub> -H <sub>168</sub> ] | Hex <sub>3</sub> |

| <b>Chromatographic peak</b> | <b>Experimental Mass (Da)</b> | <b>Theoretical Mass (Da)</b> | <b><math>\Delta M</math> (Da)</b> | <b>Sequence</b>                      | <b>PTMs</b>      |
|-----------------------------|-------------------------------|------------------------------|-----------------------------------|--------------------------------------|------------------|
| I                           | 14 317.84                     | 14 317.84                    | 0.00                              | [G <sub>30</sub> -H <sub>168</sub> ] | Hex <sub>5</sub> |
| I                           | 14 357.88                     | 14 357.99                    | 0.11                              | [T <sub>28</sub> -H <sub>168</sub> ] | Hex <sub>4</sub> |
| I                           | 14 418.89                     | 14 418.94                    | 0.05                              | [T <sub>29</sub> -H <sub>168</sub> ] | Hex <sub>5</sub> |
| I                           | 14 444.89                     | 14 445.09                    | 0.20                              | [S <sub>27</sub> -H <sub>168</sub> ] | Hex <sub>4</sub> |
| I                           | 14 479.90                     | 14 479.89                    | 0.01                              | [G <sub>30</sub> -H <sub>168</sub> ] | Hex <sub>6</sub> |
| I                           | 14 519.94                     | 14 520.04                    | 0.10                              | [T <sub>28</sub> -H <sub>168</sub> ] | Hex <sub>5</sub> |
| I                           | 14 580.94                     | 14 580.99                    | 0.05                              | [T <sub>29</sub> -H <sub>168</sub> ] | Hex <sub>6</sub> |
| I                           | 14 607.00                     | 14 607.14                    | 0.14                              | [S <sub>27</sub> -H <sub>168</sub> ] | Hex <sub>5</sub> |
| I                           | 14 641.96                     | 14 641.94                    | 0.02                              | [G <sub>30</sub> -H <sub>168</sub> ] | Hex <sub>7</sub> |
| I                           | 14 682.00                     | 14 682.09                    | 0.09                              | [T <sub>28</sub> -H <sub>168</sub> ] | Hex <sub>6</sub> |
| I                           | 14 699.13                     | 14 699.50                    | 0.37                              | [S <sub>23</sub> -H <sub>168</sub> ] | Hex <sub>3</sub> |
| I                           | 14 743.00                     | 14 743.04                    | 0.04                              | [T <sub>29</sub> -H <sub>168</sub> ] | Hex <sub>7</sub> |
| I                           | 14 769.04                     | 14 769.19                    | 0.15                              | [S <sub>27</sub> -H <sub>168</sub> ] | Hex <sub>6</sub> |
| I                           | 14 804.02                     | 14 803.99                    | 0.03                              | [G <sub>30</sub> -H <sub>168</sub> ] | Hex <sub>8</sub> |
| I                           | 14 844.04                     | 14 844.14                    | 0.10                              | [T <sub>28</sub> -H <sub>168</sub> ] | Hex <sub>7</sub> |
| I                           | 14 861.09                     | 14 861.55                    | 0.46                              | [S <sub>23</sub> -H <sub>168</sub> ] | Hex <sub>4</sub> |
| I                           | 14 905.05                     | 14 905.09                    | 0.04                              | [T <sub>29</sub> -H <sub>168</sub> ] | Hex <sub>8</sub> |

| <b>Chromatographic peak</b> | <b>Experimental Mass (Da)</b> | <b>Theoretical Mass (Da)</b> | <b><math>\Delta M</math> (Da)</b> | <b>Sequence</b>                      | <b>PTMs</b>                                         |
|-----------------------------|-------------------------------|------------------------------|-----------------------------------|--------------------------------------|-----------------------------------------------------|
| I                           | 14 932.11                     | 14 931.24                    | 0.87                              | [S <sub>23</sub> -H <sub>168</sub> ] | Hex <sub>7</sub>                                    |
| I                           | 15 024.18                     | 15 023.60                    | 0.58                              | [S <sub>23</sub> -H <sub>168</sub> ] | Hex <sub>5</sub>                                    |
| I                           | 15 186.23                     | 15 185.65                    | 0.58                              | [S <sub>23</sub> -H <sub>168</sub> ] | Hex <sub>6</sub>                                    |
| I                           | 15 348.35                     | 15 347.70                    | 0.65                              | [S <sub>23</sub> -H <sub>168</sub> ] | Hex <sub>7</sub>                                    |
| I                           | 15 510.34                     | 15 509.75                    | 0.59                              | [S <sub>23</sub> -H <sub>168</sub> ] | Hex <sub>8</sub>                                    |
| II                          | 16 335.01                     | 16 334.74                    | 0.27                              | [M <sub>1</sub> -H <sub>168</sub> ]  | HPO <sub>3</sub>                                    |
| III                         | 14 867.37                     | 14 867.35                    | 0.02                              | [C <sub>22</sub> -H <sub>168</sub> ] | GroC <sub>16</sub> C <sub>16</sub>                  |
| III                         | 15 028.44                     | 15 029.40                    | 0.96                              | [C <sub>22</sub> -H <sub>168</sub> ] | Hex <sub>1</sub> GroC <sub>16</sub> C <sub>16</sub> |
| III                         | 15 191.54                     | 15 191.45                    | 0.09                              | [C <sub>22</sub> -H <sub>168</sub> ] | Hex <sub>2</sub> GroC <sub>16</sub> C <sub>16</sub> |
| III                         | 15 353.60                     | 15 353.50                    | 0.10                              | [C <sub>22</sub> -H <sub>168</sub> ] | Hex <sub>3</sub> GroC <sub>16</sub> C <sub>16</sub> |
| III                         | 15 515.65                     | 15 515.55                    | 0.10                              | [C <sub>22</sub> -H <sub>168</sub> ] | Hex <sub>4</sub> GroC <sub>16</sub> C <sub>16</sub> |
| III                         | 15 677.70                     | 15 677.60                    | 0.10                              | [C <sub>22</sub> -H <sub>168</sub> ] | Hex <sub>5</sub> GroC <sub>16</sub> C <sub>16</sub> |
| III                         | 15 839.75                     | 15 839.65                    | 0.10                              | [C <sub>22</sub> -H <sub>168</sub> ] | Hex <sub>6</sub> GroC <sub>16</sub> C <sub>16</sub> |
| III                         | 16 001.80                     | 16 001.70                    | 0.10                              | [C <sub>22</sub> -H <sub>168</sub> ] | Hex <sub>7</sub> GroC <sub>16</sub> C <sub>16</sub> |
| III                         | 16 163.85                     | 16 163.75                    | 0.10                              | [C <sub>22</sub> -H <sub>168</sub> ] | Hex <sub>8</sub> GroC <sub>16</sub> C <sub>16</sub> |
| III                         | 16 326.87                     | 16 325.80                    | 1.07                              | [C <sub>22</sub> -H <sub>168</sub> ] | Hex <sub>9</sub> GroC <sub>16</sub> C <sub>16</sub> |
| IV                          | 14 909.43                     | 14 909.43                    | 0.00                              | [C <sub>22</sub> -H <sub>168</sub> ] | GroC <sub>16</sub> C <sub>19</sub>                  |

| <b>Chromatographic peak</b> | <b>Experimental Mass (Da)</b> | <b>Theoretical Mass (Da)</b> | <b><math>\Delta M</math> (Da)</b> | <b>Sequence</b>                      | <b>PTMs</b>                                                         |
|-----------------------------|-------------------------------|------------------------------|-----------------------------------|--------------------------------------|---------------------------------------------------------------------|
| <b>IV</b>                   | 15 233.53                     | 15 233.53                    | 0.00                              | [C <sub>22</sub> -H <sub>168</sub> ] | Hex <sub>2</sub> GroC <sub>16</sub> C <sub>19</sub>                 |
| <b>IV</b>                   | 15 395.61                     | 15 395.58                    | 0.03                              | [C <sub>22</sub> -H <sub>168</sub> ] | Hex <sub>3</sub> GroC <sub>16</sub> C <sub>19</sub>                 |
| <b>IV</b>                   | 15 557.66                     | 15 557.63                    | 0.03                              | [C <sub>22</sub> -H <sub>168</sub> ] | Hex <sub>4</sub> GroC <sub>16</sub> C <sub>19</sub>                 |
| <b>IV</b>                   | 15 719.71                     | 15 719.68                    | 0.03                              | [C <sub>22</sub> -H <sub>168</sub> ] | Hex <sub>5</sub> GroC <sub>16</sub> C <sub>19</sub>                 |
| <b>IV</b>                   | 15 881.76                     | 15 881.73                    | 0.03                              | [C <sub>22</sub> -H <sub>168</sub> ] | Hex <sub>6</sub> GroC <sub>16</sub> C <sub>19</sub>                 |
| <b>IV</b>                   | 16 044.82                     | 16 043.78                    | 1.04                              | [C <sub>22</sub> -H <sub>168</sub> ] | Hex <sub>7</sub> GroC <sub>16</sub> C <sub>19</sub>                 |
| <b>IV</b>                   | 16 206.86                     | 16 205.83                    | 1.03                              | [C <sub>22</sub> -H <sub>168</sub> ] | Hex <sub>8</sub> GroC <sub>16</sub> C <sub>19</sub>                 |
| <b>IV</b>                   | 16 368.93                     | 16 367.88                    | 1.05                              | [C <sub>22</sub> -H <sub>168</sub> ] | Hex <sub>9</sub> GroC <sub>16</sub> C <sub>19</sub>                 |
| <b>V</b>                    | 15 106.64                     | 15 105.76                    | 0.88                              | [C <sub>22</sub> -H <sub>168</sub> ] | GroC <sub>14</sub> C <sub>16</sub> C <sub>18</sub>                  |
| <b>V</b>                    | 15 117.64                     | 15 119.79                    | 2.15                              | [C <sub>22</sub> -H <sub>168</sub> ] | GroC <sub>14</sub> C <sub>16</sub> C <sub>19</sub>                  |
| <b>V</b>                    | 15 131.64                     | 15 133.81                    | 2.17                              | [C <sub>22</sub> -H <sub>168</sub> ] | GroC <sub>16</sub> C <sub>16</sub> C <sub>18</sub>                  |
| <b>V</b>                    | 15 146.68                     | 15 147.84                    | 1.16                              | [C <sub>22</sub> -H <sub>168</sub> ] | GroC <sub>16</sub> C <sub>16</sub> C <sub>19</sub>                  |
| <b>V</b>                    | 15 163.67                     | 15 163.83                    | 0.16                              | [C <sub>22</sub> -H <sub>168</sub> ] | GroC <sub>16</sub> C <sub>16</sub> C <sub>19</sub> OX <sub>1</sub>  |
| <b>V</b>                    | 15 177.64                     | 15 179.83                    | 2.19                              | [C <sub>22</sub> -H <sub>168</sub> ] | GroC <sub>16</sub> C <sub>16</sub> C <sub>19</sub> OX <sub>2</sub>  |
| <b>V</b>                    | 15 251.67                     | 15 253.79                    | 2.12                              | [C <sub>22</sub> -H <sub>168</sub> ] | Hex <sub>1</sub> GroC <sub>14</sub> C <sub>14</sub> C <sub>19</sub> |
| <b>V</b>                    | 15 267.74                     | 15 267.81                    | 0.07                              | [C <sub>22</sub> -H <sub>168</sub> ] | Hex <sub>1</sub> GroC <sub>14</sub> C <sub>16</sub> C <sub>18</sub> |
| <b>V</b>                    | 15 280.70                     | 15 281.84                    | 1.14                              | [C <sub>22</sub> -H <sub>168</sub> ] | Hex <sub>1</sub> GroC <sub>14</sub> C <sub>16</sub> C <sub>19</sub> |

| <b>Chromatographic peak</b> | <b>Experimental Mass (Da)</b> | <b>Theoretical Mass (Da)</b> | <b><math>\Delta M</math> (Da)</b> | <b>Sequence</b>                      | <b>PTMs</b>                                                                         |
|-----------------------------|-------------------------------|------------------------------|-----------------------------------|--------------------------------------|-------------------------------------------------------------------------------------|
| <b>V</b>                    | 15 294.74                     | 15 295.86                    | 1.12                              | [C <sub>22</sub> -H <sub>168</sub> ] | Hex <sub>1</sub> GroC <sub>16</sub> C <sub>16</sub> C <sub>18</sub>                 |
| <b>V</b>                    | 15 307.73                     | 15 309.89                    | 2.16                              | [C <sub>22</sub> -H <sub>168</sub> ] | Hex <sub>1</sub> GroC <sub>16</sub> C <sub>16</sub> C <sub>19</sub>                 |
| <b>V</b>                    | 15 323.72                     | 15 325.88                    | 2.16                              | [C <sub>22</sub> -H <sub>168</sub> ] | Hex <sub>1</sub> GroC <sub>16</sub> C <sub>16</sub> C <sub>19</sub> OX <sub>1</sub> |
| <b>V</b>                    | 15 427.79                     | 15 429.86                    | 2.07                              | [C <sub>22</sub> -H <sub>168</sub> ] | Hex <sub>2</sub> GroC <sub>14</sub> C <sub>16</sub> C <sub>18</sub>                 |
| <b>V</b>                    | 15 442.80                     | 15 443.89                    | 1.09                              | [C <sub>22</sub> -H <sub>168</sub> ] | Hex <sub>2</sub> GroC <sub>14</sub> C <sub>16</sub> C <sub>19</sub>                 |
| <b>V</b>                    | 15 455.80                     | 15 457.91                    | 2.11                              | [C <sub>22</sub> -H <sub>168</sub> ] | Hex <sub>2</sub> GroC <sub>16</sub> C <sub>16</sub> C <sub>18</sub>                 |
| <b>V</b>                    | 15 470.83                     | 15 471.94                    | 1.11                              | [C <sub>22</sub> -H <sub>168</sub> ] | Hex <sub>2</sub> GroC <sub>16</sub> C <sub>16</sub> C <sub>19</sub>                 |
| <b>V</b>                    | 15 488.83                     | 15 487.93                    | 0.90                              | [C <sub>22</sub> -H <sub>168</sub> ] | Hex <sub>2</sub> GroC <sub>16</sub> C <sub>16</sub> C <sub>19</sub> OX <sub>1</sub> |
| <b>V</b>                    | 15 503.80                     | 15 503.93                    | 0.13                              | [C <sub>22</sub> -H <sub>168</sub> ] | Hex <sub>2</sub> GroC <sub>16</sub> C <sub>16</sub> C <sub>19</sub> OX <sub>2</sub> |
| <b>V</b>                    | 15 576.85                     | 15 577.89                    | 1.04                              | [C <sub>22</sub> -H <sub>168</sub> ] | Hex <sub>3</sub> GroC <sub>14</sub> C <sub>14</sub> C <sub>19</sub>                 |
| <b>V</b>                    | 15 591.87                     | 15 591.91                    | 0.04                              | [C <sub>22</sub> -H <sub>168</sub> ] | Hex <sub>3</sub> GroC <sub>14</sub> C <sub>16</sub> C <sub>18</sub>                 |
| <b>V</b>                    | 15 605.88                     | 15 605.94                    | 0.06                              | [C <sub>22</sub> -H <sub>168</sub> ] | Hex <sub>3</sub> GroC <sub>14</sub> C <sub>16</sub> C <sub>19</sub>                 |
| <b>V</b>                    | 15 618.88                     | 15 619.96                    | 1.08                              | [C <sub>22</sub> -H <sub>168</sub> ] | Hex <sub>3</sub> GroC <sub>16</sub> C <sub>16</sub> C <sub>18</sub>                 |
| <b>V</b>                    | 15 632.91                     | 15 633.99                    | 1.08                              | [C <sub>22</sub> -H <sub>168</sub> ] | Hex <sub>3</sub> GroC <sub>16</sub> C <sub>16</sub> C <sub>19</sub>                 |
| <b>V</b>                    | 15 649.90                     | 15 649.98                    | 0.08                              | [C <sub>22</sub> -H <sub>168</sub> ] | Hex <sub>3</sub> GroC <sub>16</sub> C <sub>16</sub> C <sub>19</sub> OX <sub>1</sub> |
| <b>V</b>                    | 15 665.90                     | 15 665.98                    | 0.08                              | [C <sub>22</sub> -H <sub>168</sub> ] | Hex <sub>3</sub> GroC <sub>16</sub> C <sub>16</sub> C <sub>19</sub> OX <sub>2</sub> |
| <b>V</b>                    | 15 725.89                     | 15 725.91                    | 0.02                              | [C <sub>22</sub> -H <sub>168</sub> ] | Hex <sub>4</sub> GroC <sub>14</sub> C <sub>14</sub> C <sub>18</sub>                 |

| <b>Chromatographic peak</b> | <b>Experimental Mass (Da)</b> | <b>Theoretical Mass (Da)</b> | <b><math>\Delta M</math> (Da)</b> | <b>Sequence</b>                      | <b>PTMs</b>                                                                         |
|-----------------------------|-------------------------------|------------------------------|-----------------------------------|--------------------------------------|-------------------------------------------------------------------------------------|
| V                           | 15 739.91                     | 15 739.94                    | 0.03                              | [C <sub>22</sub> -H <sub>168</sub> ] | Hex <sub>4</sub> GroC <sub>14</sub> C <sub>14</sub> C <sub>19</sub>                 |
| V                           | 15 753.92                     | 15 753.96                    | 0.04                              | [C <sub>22</sub> -H <sub>168</sub> ] | Hex <sub>4</sub> GroC <sub>14</sub> C <sub>16</sub> C <sub>18</sub>                 |
| V                           | 15 767.93                     | 15 767.99                    | 0.06                              | [C <sub>22</sub> -H <sub>168</sub> ] | Hex <sub>4</sub> GroC <sub>14</sub> C <sub>16</sub> C <sub>19</sub>                 |
| V                           | 15 781.94                     | 15 782.01                    | 0.07                              | [C <sub>22</sub> -H <sub>168</sub> ] | Hex <sub>4</sub> GroC <sub>16</sub> C <sub>16</sub> C <sub>18</sub>                 |
| V                           | 15 795.96                     | 15 796.04                    | 0.08                              | [C <sub>22</sub> -H <sub>168</sub> ] | Hex <sub>4</sub> GroC <sub>16</sub> C <sub>16</sub> C <sub>19</sub>                 |
| V                           | 15 812.96                     | 15 812.03                    | 0.93                              | [C <sub>22</sub> -H <sub>168</sub> ] | Hex <sub>4</sub> GroC <sub>16</sub> C <sub>16</sub> C <sub>19</sub> Ox <sub>1</sub> |
| V                           | 15 827.95                     | 15 828.03                    | 0.08                              | [C <sub>22</sub> -H <sub>168</sub> ] | Hex <sub>4</sub> GroC <sub>16</sub> C <sub>16</sub> C <sub>19</sub> Ox <sub>2</sub> |
| V                           | 15 887.94                     | 15 887.96                    | 0.02                              | [C <sub>22</sub> -H <sub>168</sub> ] | Hex <sub>5</sub> GroC <sub>14</sub> C <sub>14</sub> C <sub>18</sub>                 |
| V                           | 15 900.95                     | 15 901.99                    | 1.04                              | [C <sub>22</sub> -H <sub>168</sub> ] | Hex <sub>5</sub> GroC <sub>14</sub> C <sub>14</sub> C <sub>19</sub>                 |
| V                           | 15 915.97                     | 15 916.01                    | 0.04                              | [C <sub>22</sub> -H <sub>168</sub> ] | Hex <sub>5</sub> GroC <sub>14</sub> C <sub>16</sub> C <sub>18</sub>                 |
| V                           | 15 929.98                     | 15 930.04                    | 0.06                              | [C <sub>22</sub> -H <sub>168</sub> ] | Hex <sub>5</sub> GroC <sub>14</sub> C <sub>16</sub> C <sub>19</sub>                 |
| V                           | 15 943.99                     | 15 944.06                    | 0.07                              | [C <sub>22</sub> -H <sub>168</sub> ] | Hex <sub>5</sub> GroC <sub>16</sub> C <sub>16</sub> C <sub>18</sub>                 |
| V                           | 15 958.00                     | 15 958.09                    | 0.09                              | [C <sub>22</sub> -H <sub>168</sub> ] | Hex <sub>5</sub> GroC <sub>16</sub> C <sub>16</sub> C <sub>19</sub>                 |
| V                           | 15 975.00                     | 15 974.08                    | 0.92                              | [C <sub>22</sub> -H <sub>168</sub> ] | Hex <sub>5</sub> GroC <sub>16</sub> C <sub>16</sub> C <sub>19</sub> Ox <sub>1</sub> |
| V                           | 15 989.99                     | 15 990.08                    | 0.09                              | [C <sub>22</sub> -H <sub>168</sub> ] | Hex <sub>5</sub> GroC <sub>16</sub> C <sub>16</sub> C <sub>19</sub> Ox <sub>2</sub> |
| V                           | 16 049.98                     | 16 050.01                    | 0.03                              | [C <sub>22</sub> -H <sub>168</sub> ] | Hex <sub>6</sub> GroC <sub>14</sub> C <sub>14</sub> C <sub>18</sub>                 |
| V                           | 16 062.01                     | 16 064.04                    | 2.03                              | [C <sub>22</sub> -H <sub>168</sub> ] | Hex <sub>6</sub> GroC <sub>14</sub> C <sub>14</sub> C <sub>19</sub>                 |

| <b>Chromatographic peak</b> | <b>Experimental Mass (Da)</b> | <b>Theoretical Mass (Da)</b> | <b><math>\Delta M</math> (Da)</b> | <b>Sequence</b>                      | <b>PTMs</b>                                                                         |
|-----------------------------|-------------------------------|------------------------------|-----------------------------------|--------------------------------------|-------------------------------------------------------------------------------------|
| <b>V</b>                    | 16 078.01                     | 16 078.06                    | 0.05                              | [C <sub>22</sub> -H <sub>168</sub> ] | Hex <sub>6</sub> GroC <sub>14</sub> C <sub>16</sub> C <sub>18</sub>                 |
| <b>V</b>                    | 16 092.02                     | 16 092.09                    | 0.07                              | [C <sub>22</sub> -H <sub>168</sub> ] | Hex <sub>6</sub> GroC <sub>14</sub> C <sub>16</sub> C <sub>19</sub>                 |
| <b>V</b>                    | 16 106.03                     | 16 106.11                    | 0.08                              | [C <sub>22</sub> -H <sub>168</sub> ] | Hex <sub>6</sub> GroC <sub>16</sub> C <sub>16</sub> C <sub>18</sub>                 |
| <b>V</b>                    | 16 120.05                     | 16 120.14                    | 0.09                              | [C <sub>22</sub> -H <sub>168</sub> ] | Hex <sub>6</sub> GroC <sub>16</sub> C <sub>16</sub> C <sub>19</sub>                 |
| <b>V</b>                    | 16 137.05                     | 16 136.13                    | 0.92                              | [C <sub>22</sub> -H <sub>168</sub> ] | Hex <sub>6</sub> GroC <sub>16</sub> C <sub>16</sub> C <sub>19</sub> Ox <sub>1</sub> |
| <b>V</b>                    | 16 153.04                     | 16 152.13                    | 0.91                              | [C <sub>22</sub> -H <sub>168</sub> ] | Hex <sub>6</sub> GroC <sub>16</sub> C <sub>16</sub> C <sub>19</sub> Ox <sub>2</sub> |
| <b>V</b>                    | 16 211.05                     | 16 212.06                    | 1.01                              | [C <sub>22</sub> -H <sub>168</sub> ] | Hex <sub>7</sub> GroC <sub>14</sub> C <sub>14</sub> C <sub>18</sub>                 |
| <b>V</b>                    | 16 226.06                     | 16 226.09                    | 0.03                              | [C <sub>22</sub> -H <sub>168</sub> ] | Hex <sub>7</sub> GroC <sub>14</sub> C <sub>14</sub> C <sub>19</sub>                 |
| <b>V</b>                    | 16 240.06                     | 16 240.11                    | 0.05                              | [C <sub>22</sub> -H <sub>168</sub> ] | Hex <sub>7</sub> GroC <sub>14</sub> C <sub>16</sub> C <sub>18</sub>                 |
| <b>V</b>                    | 16 254.07                     | 16 254.14                    | 0.07                              | [C <sub>22</sub> -H <sub>168</sub> ] | Hex <sub>7</sub> GroC <sub>14</sub> C <sub>16</sub> C <sub>19</sub>                 |
| <b>V</b>                    | 16 268.08                     | 16 268.16                    | 0.08                              | [C <sub>22</sub> -H <sub>168</sub> ] | Hex <sub>7</sub> GroC <sub>16</sub> C <sub>16</sub> C <sub>18</sub>                 |
| <b>V</b>                    | 16 282.09                     | 16 282.19                    | 0.10                              | [C <sub>22</sub> -H <sub>168</sub> ] | Hex <sub>7</sub> GroC <sub>16</sub> C <sub>16</sub> C <sub>19</sub>                 |
| <b>V</b>                    | 16 298.10                     | 16 298.18                    | 0.08                              | [C <sub>22</sub> -H <sub>168</sub> ] | Hex <sub>7</sub> GroC <sub>16</sub> C <sub>16</sub> C <sub>19</sub> Ox <sub>1</sub> |
| <b>V</b>                    | 16 315.09                     | 16 314.18                    | 0.91                              | [C <sub>22</sub> -H <sub>168</sub> ] | Hex <sub>7</sub> GroC <sub>16</sub> C <sub>16</sub> C <sub>19</sub> Ox <sub>2</sub> |
| <b>V</b>                    | 16 375.09                     | 16 374.11                    | 0.98                              | [C <sub>22</sub> -H <sub>168</sub> ] | Hex <sub>8</sub> GroC <sub>14</sub> C <sub>14</sub> C <sub>18</sub>                 |
| <b>V</b>                    | 16 402.12                     | 16 402.16                    | 0.04                              | [C <sub>22</sub> -H <sub>168</sub> ] | Hex <sub>8</sub> GroC <sub>14</sub> C <sub>16</sub> C <sub>18</sub>                 |
| <b>V</b>                    | 16 417.13                     | 16 416.19                    | 0.94                              | [C <sub>22</sub> -H <sub>168</sub> ] | Hex <sub>8</sub> GroC <sub>14</sub> C <sub>16</sub> C <sub>19</sub>                 |

| <b>Chromatographic peak</b> | <b>Experimental Mass (Da)</b> | <b>Theoretical Mass (Da)</b> | <b><math>\Delta M</math> (Da)</b> | <b>Sequence</b>                      | <b>PTMs</b>                                                                         |
|-----------------------------|-------------------------------|------------------------------|-----------------------------------|--------------------------------------|-------------------------------------------------------------------------------------|
| <b>V</b>                    | 16 430.16                     | 16 430.21                    | 0.05                              | [C <sub>22</sub> -H <sub>168</sub> ] | Hex <sub>8</sub> GroC <sub>16</sub> C <sub>16</sub> C <sub>18</sub>                 |
| <b>V</b>                    | 16 444.14                     | 16 444.24                    | 0.10                              | [C <sub>22</sub> -H <sub>168</sub> ] | Hex <sub>8</sub> GroC <sub>16</sub> C <sub>16</sub> C <sub>19</sub>                 |
| <b>V</b>                    | 16 461.15                     | 16 460.23                    | 0.92                              | [C <sub>22</sub> -H <sub>168</sub> ] | Hex <sub>8</sub> GroC <sub>16</sub> C <sub>16</sub> C <sub>19</sub> Ox <sub>1</sub> |
| <b>V</b>                    | 16 477.15                     | 16 476.23                    | 0.92                              | [C <sub>22</sub> -H <sub>168</sub> ] | Hex <sub>8</sub> GroC <sub>16</sub> C <sub>16</sub> C <sub>19</sub> Ox <sub>2</sub> |
| <b>V</b>                    | 16 550.16                     | 16 550.19                    | 0.03                              | [C <sub>22</sub> -H <sub>168</sub> ] | Hex <sub>9</sub> GroC <sub>14</sub> C <sub>14</sub> C <sub>19</sub>                 |
| <b>V</b>                    | 16 564.13                     | 16 564.21                    | 0.08                              | [C <sub>22</sub> -H <sub>168</sub> ] | Hex <sub>9</sub> GroC <sub>14</sub> C <sub>16</sub> C <sub>18</sub>                 |
| <b>V</b>                    | 16 578.18                     | 16 578.24                    | 0.06                              | [C <sub>22</sub> -H <sub>168</sub> ] | Hex <sub>9</sub> GroC <sub>14</sub> C <sub>16</sub> C <sub>19</sub>                 |
| <b>V</b>                    | 16 592.21                     | 16 592.26                    | 0.05                              | [C <sub>22</sub> -H <sub>168</sub> ] | Hex <sub>9</sub> GroC <sub>16</sub> C <sub>16</sub> C <sub>18</sub>                 |
| <b>V</b>                    | 16 606.21                     | 16 606.29                    | 0.08                              | [C <sub>22</sub> -H <sub>168</sub> ] | Hex <sub>9</sub> GroC <sub>16</sub> C <sub>16</sub> C <sub>19</sub>                 |
| <b>V</b>                    | 16 623.23                     | 16 622.28                    | 0.95                              | [C <sub>22</sub> -H <sub>168</sub> ] | Hex <sub>9</sub> GroC <sub>16</sub> C <sub>16</sub> C <sub>19</sub> Ox <sub>1</sub> |
| <b>V</b>                    | 16 636.20                     | 16 638.28                    | 2.08                              | [C <sub>22</sub> -H <sub>168</sub> ] | Hex <sub>9</sub> GroC <sub>16</sub> C <sub>16</sub> C <sub>19</sub> Ox <sub>2</sub> |
